# Supplementary material for: Effect of humic acid derived from leonardite on the redistribution of uranium fractions in soil
Source: PeerJ. 2022 Oct 7;10:e14162. doi: 10.7717/peerj.14162 (PMC9549884; doi:10.7717/peerj.14162)
Supplement: Supplemental Information 1 [file peerj-10-14162-s001.xlsx]

## Sheet: EXC
Number	Correnpond	Soil (g)	Diluted times	Test Conc.(ppb)	Corrected Conc. (ppb)	mg/kg
1	CK 1-1	1.0041	1	4.584	0.3979	0.00990688
2	CK 1-2	1.0019	1	3.042	-1.1441	-0.0285483	0
3	L-HA 1-1	1.0007	1	2.591	-1.5951	-0.0398496
4	L-HA 1-2	1	1	2.311	-1.8751	-0.0468775	0		Standard
5	L-HA 1-1	1.0068	1	1.717	-2.4691	-0.0613106			2.893	0
6	L-HA 1-2	1.0062	1	1.774	-2.4121	-0.0599309	0		6.808	5
7	C-HA 1-1	1.0013	1	1.887	-2.2991	-0.0574029			9.76	10
8	C-HA 1-2	1.0064	1	2.167	-2.0191	-0.0501565	0		35.302	50
9	C-HA 1-1	1.0059	1	1.688	-2.4981	-0.0620862			64.444	100
10	C-HA 1-2	1.0043	1	1.897	-2.2891	-0.0569825	0
11	CK 2-1	1.0042	1	21.401	17.2149	0.428572
12	CK 2-2	1.0058	1	34.637	30.4509	0.756883	0.592728
13	L-HA 2-1	1.0043	1	18.929	14.7429	0.366994
14	L-HA 2-2	1.0042	1	8.105	3.9189	0.0975627	0.232279
15	L-HA 2-1	1.0014	1	15.733	11.5469	0.288269
16	L-HA 2-2	1.0045	1	8.935	4.7489	0.118191	0.20323
17	C-HA 2-1	1.0003	1	5.834	1.6479	0.0411851
18	C-HA 2-2	1.0005	1	21.008	16.8219	0.420337	0.230761
19	C-HA 2-1	1.0062	1	23.419	19.2329	0.47786
20	C-HA 2-2	1.0002	1	27.019	22.8329	0.570708	0.524284
21	CK 3-1	1.0047	1	18.129	13.9429	0.346942
22	CK 3-2	1.0024	1	17.503	13.3169	0.332125	0.339534
23	L-HA 3-1	1.0003	1	17.438	13.2519	0.331198
24	L-HA 3-2	1.0044	1	17.315	13.1289	0.326785	0.328991
25	L-HA 3-1	1.0078	1	8.998	4.8119	0.119366
26	L-HA 3-2	1.0035	1	9.436	5.2499	0.13079	0.125078
27	C-HA 3-1	1.0021	1	17.367	13.1809	0.328832
28	C-HA 3-2	1.0059	1	30.003	25.8169	0.641637	0.485234
29	C-HA 3-1	1.005	1	27.695	23.5089	0.584799
30	C-HA 3-2	1.004	1	23.114	18.9279	0.471312	0.528055
Extraction agent: 25 mL 1 M NH4NO3(pH=7)
Here, 1-1~1-2 means UO2
2-1~2-2 means UO3
3-1~3-2 means UO2(NO3)2

## Sheet: CARB
Number	Correnpond	Soil (g)	Diluted times	Test Conc.(ppb)	Corrected Conc. (ppb)	mg/kg
1	CK 1-1	1.0041	50	17.434	15.7022	19.5476
2	CK 1-2	1.0019	50	8.836	4.46975	5.57659	5.57659
3	L-HA 1-1	1.0007	50	7.222	2.36122	2.94946
4	L-HA 1-2	1	50	4.23	-1.54753	-1.93441	0.507526
5	L-HA 1-1	1.0068	50	4.812	-0.787203	-0.977358
6	L-HA 1-2	1.0062	50	3.466	-2.54562	-3.16242	0
7	C-HA 1-1	1.0013	50	3.845	-2.05049	-2.55979
8	C-HA 1-2	1.0064	50	3.098	-3.02637	-3.75891	0			Standard
9	C-HA 1-1	1.0059	50	3.089	-3.03813	-3.77539
10	C-HA 1-2	1.0043	50	2.787	-3.43266	-4.27246	0			13.218	10
11	CK 2-1	1.0042	100	24.085	24.391	60.7226				22.636	25
12	CK 2-2	1.0058	100	23.368	23.4544	58.2978	59.5102			46.661	50
13	L-HA 2-1	1.0043	50	33.262	36.3799	45.2801				80.759	100
14	L-HA 2-2	1.0042	50	55.074	64.8751	80.7547	63.0174
15	L-HA 2-1	1.0014	50	38.932	43.7872	54.6574
16	L-HA 2-2	1.0045	50	50.288	58.6226	72.95	63.8037
17	C-HA 2-1	1.0003	50	43.008	49.1121	61.3717
18	C-HA 2-2	1.0005	50	48.689	56.5337	70.6318	66.0017
19	C-HA 2-1	1.0062	50	44.163	50.6209	62.8863
20	C-HA 2-2	1.0002	50	62.284	74.2942	92.8492	77.8677
21	CK 3-1	1.0047	50	62.649	74.7711	93.0266
22	CK 3-2	1.0024	50	32.827	35.8116	44.6573	68.842
23	L-HA 3-1	1.0003	50	37.857	42.3828	52.9626
24	L-HA 3-2	1.0044	50	33.817	37.1049	46.178	49.5703
25	L-HA 3-1	1.0078	50	32.148	34.9245	43.3178
26	L-HA 3-2	1.0035	50	29.951	32.0544	39.9282	41.623
27	C-HA 3-1	1.0021	50	38.901	43.7467	54.5687
28	C-HA 3-2	1.0059	50	39.187	44.1203	54.8269	54.6978
29	C-HA 3-1	1.005	50	36.836	41.049	51.0559
30	C-HA 3-2	1.004	50	49.261	57.281	71.3159	61.1859
Extraction agent: 25 mL 1 M CH3COONa(pH=5 adjusted by CH3COOH)

## Sheet: ERO
Number	Correnpond	Soil (g)	Diluted times	Test Conc.(ppb)	Corrected Conc. (ppb)	mg/kg
1	CK 1-1	1.0041	1	4.528	6.07456	0.151244
2	CK 1-2	1.0019	1	3.049	4.05898	0.101282	0.126263
3	L-HA 1-1	1.0007	1	2.444	3.23448	0.0808055
4	L-HA 1-2	1	1	2.848	3.78505	0.0946264	0.0877159
5	L-HA 1-1	1.0068	1	2.276	3.00553	0.0746308
6	L-HA 1-2	1.0062	1	2.079	2.73706	0.0680049	0.0713179		Standard
7	C-HA 1-1	1.0013	1	2.246	2.96465	0.07402			1.483	0
8	C-HA 1-2	1.0064	1	2.285	3.0178	0.0749652	0.0744926		4.877	5
9	C-HA 1-1	1.0059	1	1.829	2.39636	0.0595576			7.993	10
10	C-HA 1-2	1.0043	1	1.874	2.45769	0.0611791	0.0603684		17.745	25
11	CK 2-1	1.0042	1	6.217	8.37633	0.208532			32.44	50
12	CK 2-2	1.0058	1	7.024	9.47611	0.235537	0.222034		75.304	100
13	L-HA 2-1	1.0043	1	6.838	9.22263	0.229578
14	L-HA 2-2	1.0042	1	6.429	8.66524	0.215725	0.222652
15	L-HA 2-1	1.0014	1	10.139	13.7212	0.342551
16	L-HA 2-2	1.0045	1	9.032	12.2126	0.303947	0.323249
17	C-HA 2-1	1.0003	1	4.152	5.56215	0.139012
18	C-HA 2-2	1.0005	1	10.572	14.3113	0.357604	0.248308
19	C-HA 2-1	1.0062	1	37.812	51.434	1.27793
20	C-HA 2-2	1.0002	1	22.607	30.7126	0.767662	1.02279
21	CK 3-1	1.0047	1	11.294	15.2953	0.380593
22	CK 3-2	1.0024	1	7.012	9.45975	0.235928	0.30826
23	L-HA 3-1	1.0003	1	6.926	9.34255	0.233494
24	L-HA 3-2	1.0044	1	5.435	7.31062	0.181965	0.207729
25	L-HA 3-1	1.0078	1	8.561	11.5707	0.287029
26	L-HA 3-2	1.0035	1	8.516	11.5094	0.286732	0.28688
27	C-HA 3-1	1.0021	1	6.395	8.61891	0.215021
28	C-HA 3-2	1.0059	1	8.566	11.5775	0.287741	0.251381
29	C-HA 3-1	1.005	1	5.739	7.72491	0.192162
30	C-HA 3-2	1.004	1	8.053	10.8784	0.270877	0.23152
Extraction agent: 25 mL 0.1 M NH2OHHCl+0.01 M HCl(pH=2)

## Sheet: OM
Number	Correnpond	Soil (g)	Diluted times	Test Conc.(ppb)	Corrected Conc. (ppb)	mg/kg
1	CK 1-1	1.0041	1	2140.9	2031.09	50.5699
2	CK 1-2	1.0019	1	2419.8	2294.85	57.2624	53.9161
3	L-HA 1-1	1.0007	1	2501.6	2372.2	59.2636
4	L-HA 1-2	1	1	2058.5	1953.16	48.8291	54.0464
5	L-HA 1-1	1.0068	1	1636.4	1553.98	38.5872
6	L-HA 1-2	1.0062	1	1531.7	1454.97	36.1501	37.3687
7	C-HA 1-1	1.0013	1	1736.8	1648.93	41.1698
8	C-HA 1-2	1.0064	1	2407.5	2283.21	56.7174	48.9436
9	C-HA 1-1	1.0059	1	2373.5	2251.06	55.9464					Standard
10	C-HA 1-2	1.0043	1	2388.8	2265.53	56.3957	56.1711				16.942	0
11	CK 2-1	1.0042	1	549.3	525.914	13.0929					5.994	5
12	CK 2-2	1.0058	1	449.14	431.193	10.7177	11.9053				19.753	25
13	L-HA 2-1	1.0043	1	354.63	341.815	8.50878					51.838	50
14	L-HA 2-2	1.0042	1	614.21	587.299	14.6211	11.5649				77.202	100
15	L-HA 2-1	1.0014	1	972.86	926.475	23.1295					160.12	150
16	L-HA 2-2	1.0045	1	890.39	848.483	21.117	22.1233
17	C-HA 2-1	1.0003	1	589.9	564.31	14.1035
18	C-HA 2-2	1.0005	1	742.73	708.841	17.7122	15.9078
19	C-HA 2-1	1.0062	1	1359.7	1292.31	32.1087
20	C-HA 2-2	1.0002	1	1104.7	1051.16	26.2736	29.1912
21	CK 3-1	1.0047	1	336.73	324.887	8.08417
22	CK 3-2	1.0024	1	398.03	382.858	9.54854	8.81635
23	L-HA 3-1	1.0003	1	349.87	337.313	8.4303
24	L-HA 3-2	1.0044	1	440.86	423.362	10.5377	9.484
25	L-HA 3-1	1.0078	1	592.58	566.844	14.0614
26	L-HA 3-2	1.0035	1	678.83	648.411	16.1537	15.1076
27	C-HA 3-1	1.0021	1	376.81	362.79	9.05075
28	C-HA 3-2	1.0059	1	448.67	430.748	10.7055	9.87815
29	C-HA 3-1	1.005	1	506.14	485.098	12.0671
30	C-HA 3-2	1.004	1	492.15	471.867	11.7497	11.9084
Extraction agent: 3 mL 0.01 M HNO3 + 7 mL H2O2+ 15 mL 1 M NH4NO3
Number	Correnpond	Soil (g)	Diluted times	Test Conc.(ppb)	Corrected Conc. (ppb)	mg/kg
	Control 1-1	1.0041	20	107.57	99.9577	49.7748
	Control 1-2	1.0019	20	186.54	172.934	86.303	68.0389
	Leo-HA 1-1	1.0007	20	182.78	169.459	84.6704
	Leo-HA 1-2	1	20	203.89	188.967	94.4835	89.577
	Leo-HA 1-1	1.0068	20	128.17	118.994	59.0953
	Leo-HA 1-2	1.0062	20	153.92	142.79	70.955	65.0251
	purchased HA 1-1	1.0013	20	99.255	92.2738	46.077
	purchased HA 1-2	1.0064	20	132.29	122.801	61.0103	53.5437
	purchased HA 1-1	1.0059	20	174.89	147.433	73.2843
	purchased HA 1-2	1.0043	20	173.67	146.334	72.8537	73.069
	Control 2-1	1.0042	10	56.784	41.0081	10.2091
	Control 2-2	1.0058	10	54.512	38.9608	9.68402	9.94658
	Leo-HA 2-1	1.0043	10	59.749	43.6798	10.8732
	Leo-HA 2-2	1.0042	10	85.029	66.4596	16.5454	13.7093
	Leo-HA 2-1	1.0014	10	143.85	119.463	29.8241
	Leo-HA 2-2	1.0045	10	108.11	87.2579	21.7168	25.7704
	purchased HA 2-1	1.0003	10	75.596	57.9596	14.4855
	purchased HA 2-2	1.0005	10	79.262	61.263	15.3081	14.8968
	purchased HA 2-1	1.0062	10	223.24	191.002	47.4562
	purchased HA 2-2	1.0002	10	199.01	169.168	42.2835	44.8698
	Control 3-1	1.0047	5	54.711	39.1401	4.86962
	Control 3-2	1.0024	5	90.733	71.5995	8.92851	6.89907
	Leo-HA 3-1	1.0003	5	81.182	62.9931	7.87178
	Leo-HA 3-2	1.0044	5	76.85	59.0895	7.35384	7.61281
	Leo-HA 3-1	1.0078	5	143.22	118.896	14.7469
	Leo-HA 3-2	1.0035	5	197.48	167.789	20.9005	17.8237
	purchased HA 3-1	1.0021	5	65.813	49.1441	6.13014
	purchased HA 3-2	1.0059	5	70.721	53.5667	6.65656	6.39335
	purchased HA 3-1	1.005	5	76.027	58.3479	7.25721
	purchased HA 3-2	1.004	5	104.01	83.5634	10.4038	8.83051

## Sheet: AmoFe
Number	Correnpond	Soil (g)	Diluted times	Test Conc.(ppb)	Corrected Conc. (ppb)	mg.kg
1	CK 1-1	1.0041	1	106.48	97.1038	2.41768
2	CK 1-2	1.0019	1	148.49	134.892	3.3659	2.89179
3	L-HA 1-1	1.0007	1	94.194	86.0525	2.14981
4	L-HA 1-2	1	1	165.07	149.805	3.74514	2.94747
5	L-HA 1-1	1.0068	1	247.22	223.699	5.55471
6	L-HA 1-2	1.0062	1	109.54	99.8562	2.48102	4.01787
7	C-HA 1-1	1.0013	1	155.23	140.954	3.51928
8	C-HA 1-2	1.0064	1	143.08	130.025	3.22996	3.37462
9	C-HA 1-1	1.0059	1	193.3	175.198	4.35427
10	C-HA 1-2	1.0043	1	146.05	132.697	3.30322	3.82874				Standard
11	CK 2-1	1.0042	1	109.69	99.9912	2.48932					6.542	0
12	CK 2-2	1.0058	1	40.495	37.7503	0.938314	1.71382				4.529	5
13	L-HA 2-1	1.0043	1	60.762	55.9804	1.39352					7.291	10
14	L-HA 2-2	1.0042	1	48.793	45.2143	1.12563	1.25957				30.155	25
15	L-HA 2-1	1.0014	1	425.86	384.386	9.59622					52.186	50
16	L-HA 2-2	1.0045	1	258.71	234.035	5.82466	7.71044				109.36	75
17	C-HA 2-1	1.0003	1	159.86	145.119	3.62689
18	C-HA 2-2	1.0005	1	151.54	137.635	3.43916	3.53302
19	C-HA 2-1	1.0062	1	495.09	446.658	11.0977
20	C-HA 2-2	1.0002	1	266.05	240.637	6.01472	8.55619
21	CK 3-1	1.0047	1	132.3	120.329	2.99415
22	CK 3-2	1.0024	1	114.38	104.21	2.59901	2.79658
23	L-HA 3-1	1.0003	1	116.55	106.162	2.65325
24	L-HA 3-2	1.0044	1	119.97	109.238	2.71899	2.68612
25	L-HA 3-1	1.0078	1	152.86	138.823	3.4437
26	L-HA 3-2	1.0035	1	172.66	156.633	3.90216	3.67293
27	C-HA 3-1	1.0021	1	134.27	122.101	3.04612
28	C-HA 3-2	1.0059	1	119.68	108.977	2.70845	2.87729
29	C-HA 3-1	1.005	1	106.4	97.0318	2.41373
30	C-HA 3-2	1.004	1	98.144	89.6055	2.23121	2.32247
Extraction agent: 0.2 M (NH4)2C2O4-0.2 M H2C2O4 (pH=2.89)

## Sheet: CryFe
Number	Correnpond	Soil (g)	Diluted times	Test Conc.(ppb)	Corrected Conc. (ppb)	mg/kg
1	CK 1-1	1.0041	1	47.13	57.5394	1.43261
2	CK 1-2	1.0019	1	93.318	113.067	2.8213	2.12696
3	L-HA 1-1	1.0007	1	62.899	76.4969	1.91108
4	L-HA 1-2	1	1	67.402	81.9104	2.04776	1.97942
5	L-HA 1-1	1.0068	1	62.834	76.4187	1.89756
6	L-HA 1-2	1.0062	1	67.331	81.825	2.03302	1.96529
7	C-HA 1-1	1.0013	1	72.426	87.9502	2.1959				Standard
8	C-HA 1-2	1.0064	1	75.648	91.8237	2.28099	2.23845			1.855	0
9	C-HA 1-1	1.0059	1	85.532	103.706	2.57745				4.158	5
10	C-HA 1-2	1.0043	1	63.948	77.758	1.93563	2.25654			8.955	10
11	CK 2-1	1.0042	1	17.316	21.697	0.540156				19.672	25
12	CK 2-2	1.0058	1	12.961	16.4614	0.409162	0.474659			37.065	50
13	L-HA 2-1	1.0043	1	12.334	15.7076	0.39101				63.743	75
14	L-HA 2-2	1.0042	1	16.93	21.2329	0.528604	0.459807
15	L-HA 2-1	1.0014	1	26.434	32.6587	0.815325
16	L-HA 2-2	1.0045	1	21.111	26.2593	0.653543	0.734434
17	C-HA 2-1	1.0003	1	12.934	16.429	0.410601
18	C-HA 2-2	1.0005	1	15.973	20.0824	0.50181	0.456205
19	C-HA 2-1	1.0062	1	34.24	42.043	1.0446
20	C-HA 2-2	1.0002	1	24.582	30.4322	0.760652	0.902626
21	CK 3-1	1.0047	1	11.704	14.9502	0.372008
22	CK 3-2	1.0024	1	13.892	17.5807	0.438464	0.405236
23	L-HA 3-1	1.0003	1	12.118	15.448	0.386083
24	L-HA 3-2	1.0044	1	12.408	15.7966	0.393185	0.389634
25	L-HA 3-1	1.0078	1	13.799	17.4689	0.433341
26	L-HA 3-2	1.0035	1	14.507	18.32	0.456403	0.444872
27	C-HA 3-1	1.0021	1	11.361	14.5379	0.362686
28	C-HA 3-2	1.0059	1	11.492	14.6954	0.36523	0.363958
29	C-HA 3-1	1.005	1	11.387	14.5692	0.362417
30	C-HA 3-2	1.004	1	14.167	17.9113	0.445998	0.404207
Extraction agent: 25 mL 0.04 M NH2OHHCl in 25% CHCOOH
