# Supplementary material for: Effect of humic acid derived from leonardite on the redistribution of uranium fractions in soil
Source: PeerJ. 2022 Oct 7;10:e14162. doi: 10.7717/peerj.14162 (PMC9549884; doi:10.7717/peerj.14162)
Supplement: Supplemental Information 2 [file peerj-10-14162-s002.xlsx]

## Sheet: Sheet1
Washing agent
1-1/1 means UO2
2-1/1 means UO3
3-1/2 means UO2(NO3)2

## Sheet: Ca（NO3)2
Aged days	Correnpond	Added C content (mg C/kg/soil)	Soil(g)	Diluted times	Test Conc.(ppb)	Corrected Conc. (ppb)	bearing cation species(mg/kg)
1	CK 1-1	0	1.0187	200	1.744	2.23457	4.38709			Test Conc.	Actual Conc.
	CK 1-2	0	1.0295	200	-0.133	0.558218	1.08444	2.73577	2.33533	0.041	0.5
	L-HA 1-1	1000	1.0057	200	-0.326	0.385849	0.767325			0.563	1
	L-HA 1-2	1000	1.0053	200	-0.381	0.336729	0.669907	0.718616	0.0688848	2.219	2.5
	L-HA 1-1	3000	1.0066	200	-0.364	0.351912	0.699208			4.73	5
	L-HA 1-2	3000	1.0025	200	-0.452	0.273319	0.545274	0.622241	0.108848	9.656	10
	C-HA 1-1	1000	1.0059	200	-0.446	0.278677	0.554086			27.509	25
	C-HA 1-2	1000	1.0087	200	-0.442	0.28225	0.559631	0.556858	0.00392099
	C-HA 1-1	3000	1.0056	200	-0.458	0.26796	0.532936
	C-HA 1-2	3000	1.0046	200	-0.464	0.262602	0.522798	0.527867	0.00716839							B-1	1.0744
	CK 2-1		0.9992	200	-0.231	0.470694	0.942142									B-2	1.0325
	CK 2-2		0.9978	200	-0.359	0.356377	0.714326	0.828234	0.16109
	L-HA 2-1		1.0056	200	-0.405	0.315295	0.627077
	L-HA 2-2		1.0064	200	-0.406	0.314401	0.624804	0.625941	0.00160747
	L-HA 2-1		1.0091	200	-0.445	0.279571	0.554099
	L-HA 2-2		1.0111	200	-0.421	0.301005	0.595401	0.57475	0.029205
	C-HA 2-1		1.0049	200	-0.403	0.317081	0.631069
	C-HA 2-2		1.008	200	-0.359	0.356377	0.707097	0.669083	0.0537601
	C-HA 2-1		1.0036	200	-0.482	0.246526	0.491283
	C-HA 2-2		1.007	200	-0.456	0.269746	0.535743	0.513513	0.0314377
	CK 3-1		1.0035	200	0.875	1.45846	2.90675
	CK 3-2		1.0086	200	0.411	1.04406	2.07032	2.48854	0.591444
	L-HA 3-1		1.0077	200	0.111	0.776134	1.54041
	L-HA 3-2		1.0016	200	0.194	0.850261	1.69781	1.61911	0.111298
	L-HA 3-1		1.0057	200	-0.243	0.459977	0.914739
	L-HA 3-2		1.006	200	-0.234	0.468015	0.930447	0.922593	0.0111066
	C-HA 3-1		1.0065	200	0.343	0.983333	1.95397
	C-HA 3-2		1.0058	200	0.254	0.903847	1.79727	1.87562	0.1108
	C-HA 3-1		1.0012	200	0.608	1.22	2.43709
	C-HA 3-2		1.0052	200	0.393	1.02799	2.04534	2.24121	0.277005		-0.057	0.5
3	CK 1-1		0.9972	200	1.578	1.9983	4.00783				0.468	1
	CK 1-2		0.9986	200	1.578	1.9983	4.00221	4.00502	0.00397311		2.018	2.5
	L-HA 1-1		1.0119	200	1.578	1.9983	3.94961				4.663	5
	L-HA 1-2		1.0062	200	1.578	1.9983	3.97198	3.96079	0.0158208		10.582	10
	L-HA 1-1		1.0082	200	1.578	1.9983	3.9641				26.02	25
	L-HA 1-2		1.0029	200	1.578	1.9983	3.98505	3.97458	0.0148132
	C-HA 1-1		1.0048	200	1.578	1.9983	3.97751
	C-HA 1-2		0.9961	200	1.578	1.9983	4.01225	3.99488	0.0245648
	C-HA 1-1		1.0009	200	1.578	1.9983	3.99301
	C-HA 1-2		1.008	200	1.578	1.9983	3.96489	3.97895	0.0198877
	CK 2-1		0.9993	200	1.578	1.9983	3.99941
	CK 2-2		0.9938	200	1.578	1.9983	4.02154	4.01047	0.0156511
	L-HA 2-1		0.9928	200	1.578	1.9983	4.02559
	L-HA 2-2		0.9942	200	1.578	1.9983	4.01992	4.02276	0.00400838
	L-HA 2-1		1.0008	200	1.578	1.9983	3.99341
	L-HA 2-2		1.0027	200	1.578	1.9983	3.98585	3.98963	0.00535071
	C-HA 2-1		0.9984	200	1.578	1.9983	4.00301
	C-HA 2-2		0.998	200	1.578	1.9983	4.00462	4.00381	0.00113449
	C-HA 2-1		1.0026	200	1.578	1.9983	3.98624
	C-HA 2-2		0.9984	200	1.578	1.9983	4.00301	3.99463	0.0118575
	CK 3-1		1.0104	200	1.578	1.9983	3.95547
	CK 3-2		1.0101	200	1.578	1.9983	3.95664	3.95606	0.000830692
	L-HA 3-1		0.9962	200	1.578	1.9983	4.01185
	L-HA 3-2		1.0043	200	1.578	1.9983	3.97949	3.99567	0.0228798
	L-HA 3-1		0.9973	200	1.578	1.9983	4.00743
	L-HA 3-2		0.9948	200	1.578	1.9983	4.0175	4.01246	0.00712123
	C-HA 3-1		0.9992	200	1.578	1.9983	3.99981
	C-HA 3-2		1.0002	200	1.578	1.9983	3.99581	3.99781	0.00282772
	C-HA 3-1		1	200	1.578	1.9983	3.99661
	C-HA 3-2		0.9968	200	1.578	1.9983	4.00944	4.00302	0.00907232
7	CK 1-1		1.004	200	0.525	1.09458	2.18043
	CK 1-2		1.0025	200	-0.179	0.443307	0.884403	1.53242	0.916432
	L-HA 1-1		1.0039	200	-0.282	0.348022	0.69334				-0.001	0.5
	L-HA 1-2		1.0042	200	-0.404	0.23516	0.468352	0.580846	0.15909		0.512	1
	L-HA 1-1		1.0031	200	-0.43	0.211107	0.420909				2.047	2.5
	L-HA 1-2		1.0053	200	-0.46	0.183354	0.364775	0.392842	0.0396931		4.57	5
	C-HA 1-1		1.0046	200	-0.413	0.226834	0.45159				10.054	10
	C-HA 1-2		1.0031	200	-0.442	0.200006	0.398775	0.425183	0.0373456		26.432	25
	C-HA 1-1		0.996	200	-0.392	0.246261	0.4945
	C-HA 1-2		0.9968	200	-0.385	0.252736	0.507096	0.500798	0.00890679
	CK 2-1		0.9911	200	1.107	1.63299	3.2953
	CK 2-2		0.9938	200	1.364	1.87074	3.76481	3.53006	0.331997
	L-HA 2-1		0.9957	200	0.137	0.735639	1.47763
	L-HA 2-2		0.998	200	0.307	0.892906	1.78939	1.63351	0.220447
	L-HA 2-1		0.9935	200	-0.229	0.397052	0.7993
	L-HA 2-2		0.9959	200	-0.289	0.341546	0.685904	0.742602	0.0801825
	C-HA 2-1		1.0005	200	0.958	1.49515	2.9888
	C-HA 2-2		0.9997	200	0.523	1.09273	2.18611	2.58745	0.567585
	C-HA 2-1		0.9946	200	0.935	1.47387	2.96374
	C-HA 2-2		0.9954	200	0.777	1.3277	2.66768	2.81571	0.209349
	CK 3-1		0.9958	200	1.139	1.66259	3.3392
	CK 3-2		0.9942	200	2.131	2.58029	5.19068	4.26494	1.30919
	L-HA 3-1		1.002	200	0.452	1.02705	2.04999
	L-HA 3-2		1.0034	200	0.419	0.996517	1.98628	2.01814	0.0450498
	L-HA 3-1		0.9935	200	-0.1	0.51639	1.03954
	L-HA 3-2		0.994	200	-0.063	0.550619	1.10788	1.07371	0.0483291
	C-HA 3-1		1.0028	200	1.93	2.39434	4.77532
	C-HA 3-2		1.0033	200	1.629	2.11589	4.21786	4.49659	0.394183
	C-HA 3-1		1.0021	200	1.962	2.42395	4.83773
	C-HA 3-2		1.0021	200	1.887	2.35456	4.69926	4.7685	0.097916
12	CK 1-1		0.9975	200	2.101	2.79435	5.60271
	CK 1-2		0.995	200	-0.116	0.617923	1.24206	3.42238	3.08345
	L-HA 1-1		1.0022	200	-0.334	0.403912	0.806051
	L-HA 1-2		1.0022	200	-0.395	0.344028	0.686547	0.746299	0.0845024
	L-HA 1-1		1.004	200	-0.433	0.306724	0.611004
	L-HA 1-2		1.0023	200	-0.421	0.318504	0.635547	0.623275	0.0173546
	C-HA 1-1		0.9943	200	-0.402	0.337157	0.678179
	C-HA 1-2		0.9966	200	-0.405	0.334211	0.670703	0.674441	0.00528593
	C-HA 1-1		1.003	200	-0.377	0.361699	0.721234
	C-HA 1-2		1.0051	200	-0.468	0.272364	0.541965	0.6316	0.126763				0.075	0.5
	CK 2-1		0.9986	200	1.363	2.06986	4.14552						0.594	1
	CK 2-2		0.997	200	1.981	2.67655	5.3692	4.75736	0.865276				1.599	2.5
	L-HA 2-1		1.0068	200	0.196	0.924213	1.83594						3.876	5
	L-HA 2-2		1.0062	200	0.18	0.908506	1.80582	1.82088	0.0213023				9.339	10
	L-HA 2-1		1.0028	200	-0.25	0.486375	0.970034						24.828	25
	L-HA 2-2		1.0041	200	-0.283	0.453979	0.90425	0.937142	0.046516
	C-HA 2-1		1.0024	200	1.274	1.98249	3.95548
	C-HA 2-2		1.0017	200	1.768	2.46745	4.92652	4.441	0.686627
	C-HA 2-1		1.0058	200	1.119	1.83032	3.63954
	C-HA 2-2		1.005	200	1.734	2.43407	4.84392	4.24173	0.851626
	CK 3-1		1.0013	200	0.987	1.70074	3.39706
	CK 3-2		1.0026	200	1.752	2.45174	4.89076	4.14391	1.05621
	L-HA 3-1		1.0054	200	0.669	1.38856	2.7622
	L-HA 3-2		1.0061	200	0.53	1.2521	2.48902	2.62561	0.193167
	L-HA 3-1		0.9925	200	0.089	0.819171	1.65072
	L-HA 3-2		0.9979	200	0.175	0.903598	1.811	1.73086	0.113332
	C-HA 3-1		1.0022	200	1.892	2.58918	5.16699
	C-HA 3-2		1.0037	200	2.201	2.89252	5.76372	5.46535	0.421953
	C-HA 3-1		0.9976	200	3.067	3.74267	7.50336
	C-HA 3-2		0.9999	200	2.557	3.24201	6.48466	6.99401	0.720325
18	CK 1-1		1.0017	200	1.949	2.31909	4.63031
	CK 1-2		1.0041	200	-0.142	0.309638	0.616747	2.62353	2.83801
	L-HA 1-1		1.0015	200	-0.33	0.12897	0.257554
	L-HA 1-2		1.0055	200	-0.385	0.076115	0.151397	0.204475	0.0750639		0.088	0.5
	L-HA 1-1		0.996	200	-0.436	0.027104	0.0544257				0.543	1
	L-HA 1-2		0.9989	200	-0.454	0.009806	0.0196336	0.0370296	0.0246017		2.102	2.5
	C-HA 1-1		0.9955	200	-0.409	0.053051	0.106582				4.704	5
	C-HA 1-2		0.9944	200	-0.404	0.057856	0.116364	0.111473	0.00691693		10.044	10
	C-HA 1-1		1.0069	200	-0.441	0.022299	0.0442924				25.521	25
	C-HA 1-2		1.0065	200	-0.446	0.017494	0.034762	0.0395272	0.00673897
	CK 2-1		1.002	200	3.037	3.36466	6.71588
	CK 2-2		1.0033	200	4.483	4.75426	9.47725	8.09657	1.95258
	L-HA 2-1		1.0024	200	1.048	1.45323	2.8995
	L-HA 2-2		1.0022	200	1.11	1.51281	3.01898	2.95924	0.0844859
	L-HA 2-1		0.9992	200	0.048	0.492228	0.985244
	L-HA 2-2		1.0005	200	-0.016	0.430724	0.861017	0.923131	0.0878415
	C-HA 2-1		1.0002	200	2.207	2.56703	5.13303
	C-HA 2-2		1.0004	200	2.275	2.63237	5.26264	5.19784	0.0916534
	C-HA 2-1		0.9971	200	1.801	2.17686	4.36638
	C-HA 2-2		0.9974	200	2.865	3.19937	6.41541	5.3909	1.44888
	CK 3-1		1.0003	200	2.661	3.00332	6.00484
	CK 3-2		0.9988	200	2.692	3.03311	6.07351	6.03918	0.0485582
	L-HA 3-1		1.0002	200	0.892	1.30331	2.6061
	L-HA 3-2		1.001	200	1.276	1.67234	3.34133	2.97372	0.519885
	L-HA 3-1		0.999	200	0.51	0.93621	1.87429
	L-HA 3-2		0.9985	200	0.267	0.702687	1.40749	1.64089	0.330084
	C-HA 3-1		1.0001	200	2.201	2.56126	5.12201
	C-HA 3-2		1.0016	200	3.742	4.04216	8.07141	6.59671	2.08554
	C-HA 3-1		1.0014	200	5.449	5.68259	11.3493
	C-HA 3-2		1.0029	200	5.047	5.29627	10.5619	10.9556	0.556765
24	CK 1-1		1.0056	200	0.813	1.05043	2.08916
	CK 1-2		1.0057	200	-0.144	0.139655	0.277727	1.18345	1.28088				0.92	1
	L-HA 1-1		1.0012	200	-0.197	0.0892151	0.178216						2.122	2.5
	L-HA 1-2		1.0011	200	-0.336	-0.0430712	-0.0860477	0.0460843	0.186863				5.276	5
	L-HA 1-1		1.0029	200	-0.398	-0.102077	-0.203563						9.882	10
	L-HA 1-2		1.0033	200	-0.405	-0.108739	-0.216762	-0.210162	0.00933297				26.052	25
	C-HA 1-1		0.9992	200	-0.397	-0.101125	-0.202412
	C-HA 1-2		0.9996	200	-0.433	-0.135386	-0.270881	-0.236646	0.0484148
	C-HA 1-1		0.9973	200	-0.424	-0.126821	-0.254328
	C-HA 1-2		0.9985	200	-0.414	-0.117304	-0.23496	-0.244644	0.0136954
	CK 2-1		1.0007	200	0.518	0.769681	1.53828
	CK 2-2		1.0005	200	1.854	2.04115	4.08026	2.80927	1.79745
	L-HA 2-1		1.0064	200	0.992	1.22079	2.42605
	L-HA 2-2		1.0063	200	1.397	1.60622	3.19234	2.80919	0.54185
	L-HA 2-1		1.0051	200	0.212	0.47846	0.952065
	L-HA 2-2		1.0035	200	0.067	0.340464	0.678553	0.815309	0.193402
	C-HA 2-1		0.9989	200	0.998	1.2265	2.45569
	C-HA 2-2		0.9985	200	1.223	1.44063	2.88559	2.67064	0.30398
	C-HA 2-1		0.9995	200	1.774	1.96502	3.932
	C-HA 2-2		1.0022	200	1.9	2.08493	4.16071	4.04635	0.161722
	CK 3-1		0.9992	200	1.166	1.38638	2.77498
	CK 3-2		0.998	200	1.09	1.31405	2.63337	2.70418	0.100135
	L-HA 3-1		1.0058	200	0.867	1.10182	2.19094
	L-HA 3-2		1.0028	200	0.562	0.811555	1.61858	1.90476	0.404721
	L-HA 3-1		1.0037	200	0.508	0.760164	1.51472
	L-HA 3-2		1.0016	200	0.474	0.727806	1.45329	1.484	0.0434421
	C-HA 3-1		0.9999	200	1.25	1.46632	2.93294
	C-HA 3-2		0.998	200	2.779	2.92147	5.85466	4.3938	2.06596
	C-HA 3-1		1.001	200	1.841	2.02878	4.05351
	C-HA 3-2		1.0014	200	3.341	3.45633	6.903	5.47825	2.01489
30
	CK 1-1		0.9978	200	1.901	1.27289	2.55139
	CK 1-2		0.9992	200	0.536	0.264836	0.530096	1.54074	1.42927
	L-HA 1-1		0.9943	200	0.474	0.219049	0.440609			0.528	0
	L-HA 1-2		0.994	200	0.449	0.200587	0.403595	0.422102	0.0261735	0.664	0.2
	L-HA 1-1		0.9942	200	0.438	0.192463	0.387172			1.042	0.5
	L-HA 1-2		0.9958	200	0.439	0.193202	0.388033	0.387602	0.00060892	4.333	3
	C-HA 1-1		0.9959	200	0.432	0.188032	0.377612			12.366	10
	C-HA 1-2		0.9957	200	0.439	0.193202	0.388072	0.382842	0.00739598	34.473	25
	C-HA 1-1		0.9941	200	0.431	0.187294	0.37681
	C-HA 1-2		0.9937	200	0.428	0.185078	0.372503	0.374656	0.0030458
	CK 2-1		0.996	200	2.172	1.47302	2.95788
	CK 2-2		0.9994	200	1.96	1.31646	2.6345	2.79619	0.228661
	L-HA 2-1		0.9959	200	1.523	0.993736	1.99565
	L-HA 2-2		0.9961	200	1.719	1.13848	2.28588	2.14077	0.20522
	L-HA 2-1		0.9972	200	0.903	0.535866	1.07474
	L-HA 2-2		0.9932	200	0.605	0.315793	0.635909	0.855325	0.3103
	C-HA 2-1		0.9974	200	2.021	1.36151	2.73012
	C-HA 2-2		0.9946	200	1.807	1.20347	2.42001	2.57506	0.21928
	C-HA 2-1		0.9949	200	0.807	0.46497	0.934706
	C-HA 2-2		0.996	200	0.936	0.560236	1.12497	1.02984	0.134538
	CK 3-1		0.9977	200	0.84	0.48934	0.980936
	CK 3-2		0.9988	200	0.859	0.503371	1.00795	0.994444	0.0191035
	L-HA 3-1		0.9961	200	1.202	0.756677	1.51928
	L-HA 3-2		0.9979	200	1.086	0.671011	1.34485	1.43206	0.123343
	L-HA 3-1		0.9946	200	0.941	0.563928	1.13398
	L-HA 3-2		0.9955	200	0.861	0.504849	1.01426	1.07412	0.0846543
	C-HA 3-1		0.9959	200	1.796	1.19535	2.40053
	C-HA 3-2		0.9978	200	1.772	1.17762	2.36044	2.38049	0.028353
	C-HA 3-1		0.9939	200	1.178	0.738953	1.48698
	C-HA 3-2		0.9955	200	0.887	0.52405	1.05284	1.26991	0.306983

## Sheet: CH3COOH+Ca(NO3)2
Aged days	Correnpond	Added C content (mg C/kg/soil)	Soil (g)	Diluted times	Test Conc.(ppb)	Corrected Conc. (ppb)	weak-acid soluble uranium (mg/kg)
1	CK 1-1	0	1.003	50	3.463	3.33619	1.66311
	CK 1-2	0	1.0031	50	3.315	3.19756	1.59384	1.62847	0.0489794
	L-HA 1-1	1000	1.0056	50	3.448	3.32214	1.65182
	L-HA 1-2	1000	1.0095	50	1.994	1.96018	0.970867	1.31134	0.481507			0.416	0.5
	L-HA 1-1	3000	1.0073	50	1.774	1.75411	0.870697					0.939	1
	L-HA 1-2	3000	1.0039	50	2.799	2.71422	1.35184	1.11127	0.340219			2.589	2.5
	C-HA 1-1	1000	1.006	50	2.566	2.49597	1.24054					5.136	5			B-1	1.0466
	C-HA 1-2	1000	1.0076	50	3.16	3.05237	1.51467	1.37761	0.19384			10.77	10			B-2	1.0374
	C-HA 1-1	3000	0.9998	50	2.262	2.21122	1.10583					26.533	25
	C-HA 1-2	3000	0.9998	50	1.279	1.29044	0.645349	0.875589	0.325609
	CK 2-1		1.0032	50	27.04	25.4208	12.6698
	CK 2-2		1.001	50	18.873	17.7707	8.87649	10.7732	2.6823
	L-HA 2-1		1.0052	50	22.513	21.1803	10.5354
	L-HA 2-2		1.0059	50	24.989	23.4996	11.6809	11.1081	0.809992
	L-HA 2-1		1.0029	50	18.395	17.323	8.63645
	L-HA 2-2		1.0047	50	26.84	25.2334	12.5577	10.5971	2.77274
	C-HA 2-1		1.0091	50	31.019	29.1479	14.4425
	C-HA 2-2		1.0049	50	49.003	45.9935	22.8846	18.6636	5.96947
	C-HA 2-1		1.004	50	31.59	29.6828	14.7822
	C-HA 2-2		1.0075	50	21.51	20.2408	10.0451	12.4137	3.34969
	CK 3-1		0.9972	50	47.736	44.8067	22.4663
	CK 3-2		0.9901	50	46.351	43.5094	21.9722	22.2192	0.349343
	L-HA 3-1		1.0072	50	50.337	47.2431	23.4527
	L-HA 3-2		1.0074	50	36.88	34.6379	17.1917	20.3222	4.42716
	L-HA 3-1		0.9935	50	39.615	37.1998	18.7216
	L-HA 3-2		0.9956	50	35.758	33.5869	16.8677	17.7946	1.3109
	C-HA 3-1		0.9966	50	32.957	30.9632	15.5344
	C-HA 3-2		0.9932	50	24.141	22.7053	11.4304	13.4824	2.90201
	C-HA 3-1		1.0022	50	40.198	37.7459	18.8315
	C-HA 3-2		1.0028	50	35.329	33.1851	16.5462	17.6889	1.61595
3
	CK 1-1		0.991	50	8.781	5.91348	2.98359
	CK 1-2		1.0015	50	3.643	1.59859	0.798099	1.89085	1.54538
	L-HA 1-1		1.0176	50	3.99	1.89	0.928657					4.447	2.5
	L-HA 1-2		1.0096	50	3.346	1.34917	0.668171	0.798414	0.184191			7.592	5
	L-HA 1-1		0.9988	50	5.384	3.06068	1.53218					14.738	10
	L-HA 1-2		0.9983	50	2.866	0.946067	0.473839	1.00301	0.74836			30.536	25
	C-HA 1-1		0.9947	50	3.227	1.24923	0.627945					61.533	50
	C-HA 1-2		0.9992	50	2.713	0.817577	0.409116	0.518531	0.154736
	C-HA 1-1		1.0019	50	3.885	1.80182	0.899203
	C-HA 1-2		1.0018	50	2.833	0.918353	0.458352	0.678777	0.311729
	CK 2-1		0.9955	50	50.173	40.6745	20.4292
	CK 2-2		1.0077	50	45.401	36.667	18.1934	19.3113	1.58094
	L-HA 2-1		1.0037	50	72.404	59.3441	29.5627
	L-HA 2-2		1.0004	50	44.087	35.5635	17.7746	23.6686	8.3354
	L-HA 2-1		1.0001	50	45.045	36.368	18.1822
	L-HA 2-2		0.9977	50	85.797	70.5915	35.3771	26.7797	12.1587
	C-HA 2-1		0.9935	50	56.643	46.108	23.2048
	C-HA 2-2		0.998	50	36.072	28.8325	14.4451	18.825	6.19405
	C-HA 2-1		1.0043	50	59.779	48.7416	24.2665
	C-HA 2-2		1.0047	50	22.682	17.5875	8.75263	16.5095	10.9699
	CK 3-1		1.0045	50	29.764	23.535	11.7148
	CK 3-2		1.0049	50	30.881	24.4731	12.1769	11.9458	0.326739
	L-HA 3-1		0.9992	50	49.696	40.2739	20.1531
	L-HA 3-2		1.0035	50	52.293	42.4549	21.1534	20.6532	0.707334
	L-HA 3-1		1.0031	50	34.316	27.3578	13.6366
	L-HA 3-2		1.0032	50	41.095	33.0508	16.4727	15.0546	2.0054
	C-HA 3-1		0.9934	50	43.878	35.3879	17.8115
	C-HA 3-2		0.9905	50	41.142	33.0903	16.7038	17.2577	0.783274
	C-HA 3-1		1.0007	50	45.733	36.9458	18.46
	C-HA 3-2		0.997	50	49.756	40.3243	20.2228	19.3414	1.24652
7
	CK 1-1		0.9979	50	7.86	6.78342	3.39885
	CK 1-2		0.9966	50	3.079	2.82619	1.41792	2.40838	1.40073		2.99	2.5
	L-HA 1-1		0.9968	50	3.127	2.86592	1.43756				5.672	5
	L-HA 1-2		0.9935	50	2.537	2.37757	1.19657	1.31706	0.170409		11.658	10
	L-HA 1-1		0.992	50	3.237	2.95696	1.49041				29.498	25
	L-HA 1-2		0.9961	50	2.93	2.70286	1.35672	1.42356	0.0945288		60.258	50
	C-HA 1-1		0.9974	50	3.789	3.41386	1.71138
	C-HA 1-2		0.998	50	2.71	2.52077	1.26291	1.48714	0.317115
	C-HA 1-1		0.9948	50	2.143	2.05146	1.03109
	C-HA 1-2		0.9924	50	1.534	1.54739	0.779621	0.905357	0.177817
	CK 2-1		0.9971	50	33.25	27.7987	13.9398
	CK 2-2		0.9988	5	802.37	664.399	33.2599	23.5998	13.6614
	L-HA 2-1		1.0058	50	268.64	222.631	110.674
	L-HA 2-2		1.0047	50	87.95	73.0739	36.366	73.5198	52.5434
	L-HA 2-1		0.9995	50	66.606	55.4075	27.7176
	L-HA 2-2		0.9982	50	98.885	82.1248	41.1365	34.427	9.48856
	C-HA 2-1		0.9966	50	57.906	48.2065	24.1855
	C-HA 2-2		0.9979	50	52.862	44.0316	22.0621	23.1238	1.50144
	C-HA 2-1		0.9982	50	40.768	34.0214	17.0414
	C-HA 2-2		0.9989	50	40.019	33.4014	16.7191	16.8802	0.22787
	CK 3-1		0.997	50	46.955	39.1424	19.6301
	CK 3-2		0.9981	50	40.792	34.0412	17.053	18.3415	1.82225
	L-HA 3-1		1.0019	50	39.392	32.8825	16.4101
	L-HA 3-2		1.0012	50	41.381	34.5288	17.2437	16.8269	0.589468
	L-HA 3-1		0.9992	50	40.267	33.6067	16.8168
	L-HA 3-2		0.9958	50	41.218	34.3938	17.2695	17.0431	0.320072
	C-HA 3-1		1.0024	50	41.087	34.2854	17.1017
	C-HA 3-2		1.0012	50	41.964	35.0113	17.4847	17.2932	0.270828
	C-HA 3-1		0.9968	50	35.703	29.8291	14.9624
	C-HA 3-2		0.9965	50	39.388	32.8791	16.4973	15.7299	1.08534
12
	CK 1-1		1.0031	50	9.609	7.50145	3.73913
	CK 1-2		1.0009	50	2.978	2.04149	1.01982	2.37948	1.92284
	L-HA 1-1		1.0033	50	3.394	2.38402	1.18809
	L-HA 1-2		1.0047	50	4.01	2.89123	1.43885	1.31347	0.177318		6.219	2.5
	L-HA 1-1		0.9957	50	3.003	2.06207	1.03549				7.484	5
	L-HA 1-2		0.9983	50	3.855	2.76361	1.38416	1.20982	0.246546		12.917	10
	C-HA 1-1		0.9991	50	4.737	3.48985	1.74649				29.336	29
	C-HA 1-2		1.0001	50	3.755	2.68127	1.3405	1.5435	0.287082		63.738	50
	C-HA 1-1		0.9958	50	2.668	1.78623	0.896883
	C-HA 1-2		0.9994	50	3.135	2.17076	1.08603	0.991457	0.133748
	CK 2-1		1.0067	50	61.243	50.0169	24.842
	CK 2-2		1.0052	50	58.445	47.713	23.7331	24.2875	0.784116
	L-HA 2-1		0.991	100	43.648	35.5292	35.8518
	L-HA 2-2		0.994	100	51.185	41.7351	41.9871	38.9194	4.33826
	L-HA 2-1		0.9996	100	54.478	44.4466	44.4644
	L-HA 2-2		0.9932	100	30.026	24.3128	24.4793	34.4718	14.1316
	C-HA 2-1		1.0064	50	45.121	36.742	18.2542
	C-HA 2-2		1.0025	10	408.16	335.668	33.4831	25.8687	10.7685
	C-HA 2-1		1.0029	50	103	84.3996	42.0778
	C-HA 2-2		1.0024	50	41.688	33.9153	16.917	29.4974	17.7913
	CK 3-1		0.9994	50	35.456	28.7839	14.4006
	CK 3-2		0.9996	50	49.775	40.5741	20.2952	17.3479	4.16812
	L-HA 3-1		0.998	50	32.72	26.531	13.2921
	L-HA 3-2		0.9944	50	37.508	30.4735	15.3225	14.3073	1.43574
	L-HA 3-1		1.001	50	39.215	31.879	15.9236
	L-HA 3-2		0.9988	50	32.389	26.2585	13.145	14.5343	1.96474
	C-HA 3-1		1.0048	50	37.052	30.098	14.9771
	C-HA 3-2		1.0049	50	40.744	33.138	16.4882	15.7327	1.06851
	C-HA 3-1		0.9936	50	53.229	43.4182	21.8489
	C-HA 3-2		0.9948	50	40.832	33.2105	16.692	19.2705	3.64646
18
	CK 1-1		0.9994	50	10.283	8.27296	4.13896
	CK 1-2		0.9989	50	4.722	3.83083	1.91753	3.02824	1.57079
	L-HA 1-1		0.9974	50	4.464	3.62474	1.8171
	L-HA 1-2		0.997	50	3.545	2.89065	1.44967	1.63338	0.259808		4.259	2.5
	L-HA 1-1		0.9927	50	5.269	4.26778	2.14958				6.441	5
	L-HA 1-2		0.9942	50	2.606	2.14057	1.07653	1.61306	0.758761		11.435	10
	C-HA 1-1		0.9962	50	2.061	1.70523	0.855866				30.22	25
	C-HA 1-2		0.9996	50	3.011	2.46409	1.23254	1.0442	0.266346		63.08	50
	C-HA 1-1		1.0037	50	1.684	1.40408	0.699452
	C-HA 1-2		1.001	50	1.462	1.22675	0.61276	0.656106	0.0613002
	CK 2-1		0.9925	50	45.924	36.743	18.5103
	CK 2-2		0.9943	50	127.66	102.034	51.3093	34.9098	23.1924
	L-HA 2-1		1.0037	50	116.05	92.7596	46.2088
	L-HA 2-2		1.0008	50	63.338	50.6533	25.3064	35.7576	14.7803
	L-HA 2-1		1.0043	50	81.592	65.2346	32.4776
	L-HA 2-2		1.0042	50	46.1	36.8836	18.3647	25.4211	9.97939
	C-HA 2-1		0.9952	50	58.269	46.6042	23.4145
	C-HA 2-2		1.0001	50	67.521	53.9947	26.9946	25.2046	2.53156
	C-HA 2-1		1.0017	50	35.684	28.5633	14.2574
	C-HA 2-2		1.0024	50	51.473	41.1755	20.5385	17.3979	4.44139
	CK 3-1		1.0056	50	51.589	41.2682	20.5192
	CK 3-2		1.0058	50	39.04	31.2441	15.5319	18.0256	3.52652
	L-HA 3-1		1.0021	50	36.758	29.4212	14.6798
	L-HA 3-2		1.0027	50	48.312	38.6505	19.2732	16.9765	3.24806
	L-HA 3-1		0.9944	50	43.248	34.6054	17.4001
	L-HA 3-2		0.9978	50	53.444	42.75	21.4221	19.4111	2.84396
	C-HA 3-1		0.9989	50	48.754	39.0036	19.5233
	C-HA 3-2		0.9979	50	40.041	32.0437	16.0555	17.7894	2.45206
	C-HA 3-1		1.001	50	45.585	36.4722	18.2179
	C-HA 3-2		1.002	50	41.366	33.1021	16.518	17.3679	1.202
24
	CK 1-1		1.0055	50	12.177	9.49279	4.72044
	CK 1-2		1.0075	50	69.961	57.7424	28.6563	16.6884	16.9252
	L-HA 1-1		0.9995	50	15.575	12.3301	6.16815
	L-HA 1-2		0.9991	50	7.969	5.97912	2.99225	4.5802	2.2457
	L-HA 1-1		1.0016	50	4.601	3.16683	1.58089
	L-HA 1-2		0.9997	50	7.184	5.32364	2.66262	2.12175	0.764899
	C-HA 1-1		0.998	50	3.265	2.05127	1.02769
	C-HA 1-2		0.9976	50	5.803	4.17051	2.09027	1.55898	0.751355
	C-HA 1-1		0.9935	50	4.446	3.03741	1.52864
	C-HA 1-2		0.9949	50	2.913	1.75735	0.883182	1.20591	0.456409		3.548	2.5
	CK 2-1		0.9925	50	47.194	38.732	19.5123				7.061	5
	CK 2-2		0.9971	50	11.001	8.51083	4.26779	11.8901	10.7795		13.383	10
	L-HA 2-1		0.9964	50	53.022	43.5984	21.8779				29.842	25
	L-HA 2-2		0.9956	50	56.53	46.5276	23.3666	22.6223	1.05263		60.982	50
	L-HA 2-1		0.9938	50	36.297	29.633	14.9089
	L-HA 2-2		0.9955	50	66.954	55.2316	27.7406	21.3248	9.07338
	C-HA 2-1		0.9968	50	55.807	45.9238	23.0356
	C-HA 2-2		0.9933	50	43.208	35.4037	17.8212	20.4284	3.68713
	C-HA 2-1		0.9988	50	51.961	42.7124	21.3819
	C-HA 2-2		0.9992	50	46.546	38.1909	19.1107	20.2463	1.60593
	CK 3-1		1.0024	50	35.172	28.6936	14.3125
	CK 3-2		1.0023	50	38.561	31.5234	15.7255	15.019	0.999205
	L-HA 3-1		0.9982	50	27.316	22.1339	11.0869
	L-HA 3-2		0.9974	50	30.231	24.5679	12.316	11.7014	0.869089
	L-HA 3-1		1.0007	50	39.312	32.1505	16.064
	L-HA 3-2		0.9985	50	34.943	28.5024	14.2726	15.1683	1.26671
	C-HA 3-1		1.0017	50	42.008	34.4017	17.1716
	C-HA 3-2		1.0013	50	51.828	42.6014	21.273	19.2223	2.90012
	C-HA 3-1		1	50	33.007	26.8858	13.4429
	C-HA 3-2		1.0006	50	35.595	29.0468	14.5147	13.9788	0.757864
30
	CK 1-1		0.9954	50	4.166	2.45828	1.23482
	CK 1-2		0.9953	50	2.055	0.757024	0.3803	0.80756	0.604237
	L-HA 1-1		0.9969	50	2.069	0.768307	0.385348
	L-HA 1-2		0.9975	50	1.701	0.471736	0.236459	0.310904	0.10528
	L-HA 1-1		0.9995	50	2.444	1.07052	0.535528
	L-HA 1-2		0.9982	50	1.782	0.537014	0.268991	0.402259	0.18847			1.673	1
	C-HA 1-1		0.998	50	1.457	0.275096	0.137824					6.573	5
	C-HA 1-2		0.9991	50	1.995	0.70867	0.354654	0.246239	0.153322			13.134	10
	C-HA 1-1		0.9945	50	1.496	0.306526	0.154111					32.915	25
	C-HA 1-2		0.9938	50	1.626	0.411293	0.20693	0.18052	0.0373486			68.036	50
	CK 2-1		0.9981	50	19.835	15.0859	7.55732					90.354	75
	CK 2-2		0.9987	50	18.337	13.8787	6.94838	7.25285	0.430589
	L-HA 2-1		0.9936	50	18.17	13.7441	6.91632
	L-HA 2-2		0.9943	50	20.927	15.966	8.02875	7.47253	0.786609
	L-HA 2-1		0.9927	50	25.58	19.7158	9.9304
	L-HA 2-2		0.9935	50	27.332	21.1278	10.633	10.2817	0.496807
	C-HA 2-1		0.9986	50	23.601	18.1209	9.07318
	C-HA 2-2		0.9943	50	27.292	21.0955	10.6082	9.8407	1.08545
	C-HA 2-1		0.9978	50	20.081	15.2842	7.65894
	C-HA 2-2		0.9949	50	26.276	20.2767	10.1903	8.92464	1.78997
	CK 3-1		0.9935	50	16.169	12.1315	6.10543
	CK 3-2		0.9942	50	18.303	13.8513	6.96605	6.53574	0.608545
	L-HA 3-1		0.9994	50	17.285	13.0309	6.51935
	L-HA 3-2		0.9979	50	20.164	15.3511	7.69169	7.10552	0.828965
	L-HA 3-1		0.9975	50	21.058	16.0715	8.05591
	L-HA 3-2		0.9975	50	20.507	15.6275	7.83333	7.94462	0.157389
	C-HA 3-1		0.9998	50	17.666	13.3379	6.6703
	C-HA 3-2		0.9994	50	20.467	15.5953	7.80231	7.2363	0.800452
	C-HA 3-1		0.9946	50	18.593	14.085	7.08074
	C-HA 3-2		0.9964	50	19.831	15.0827	7.5686	7.32467	0.344971

## Sheet: NaHCO3
Aged days	Correnpond	Added C content (mg C/kg/soil)	U (mg/kg)	Diluted times	Soil (g)	Test Conc.(ppb)	Correct Conc. (ppb)	Bioavailability uranium Conc.(mg/kg)	Average	SD		First	Standard
1	CK 1-1	0	100	1	1.0048	209.27	239.419	2.38275						2.899	3
	CK 1-2	0	100	1	1.0051	203.05	232.336	2.31157	2.34716	0.0503355				4.247	5									Second	4112017
	L-HA 1-1	1000	100	1	1.0023	158.63	181.75	1.81333						8.075	10									7.99	5
	L-HA 1-2	1000	100	1	1.0068	190.01	217.486	2.16017	1.98675	0.245251				18.975	25									9.515	10
	L-HA 1-1	3000	100	1	1.0062	194.33	222.405	2.21035						48.809	50									21.23	25
	L-HA 1-2	3000	100	1	1.0001	159.74	183.014	1.82996	2.02015	0.268976				60.768	75									42.208	50
	C-HA 1-1	1000	100	1	1.0073	175.03	200.426	1.98974																76.306	75
	C-HA 1-2	1000	100	1	1.0078	218.72	250.181	2.48244	2.23609	0.348394														101.05	100
	C-HA 1-1	3000	100	1	1.0082	141.34	162.06	1.60742
	C-HA 1-2	3000	100	1	1.0069	125.7	144.249	1.43261	1.52001	0.123611
	CK 2-1			50	1.0083	56.652	57.5755	28.5508
	CK 2-2			50	1.003	52.641	53.6218	26.7307	27.6407	1.28696
	L-HA 2-1			50	1.0058	77.827	78.4477	38.9977
	L-HA 2-2			50	1.0083	70.046	70.7779	35.0977	37.0477	2.75771
	L-HA 2-1			50	1.0001	60.499	61.3675	30.6807
	L-HA 2-2			50	1.0011	73.448	74.1313	37.0249	33.8528	4.48607
	C-HA 2-1			50	1.0046	42.92	44.0398	21.9191
	C-HA 2-2			50	1.001	52.722	53.7017	26.824	24.3716	3.4683									soil（g）	ppb
	C-HA 2-1			50	0.9996	54.257	55.2147	27.6184										B-1	1.0224	3.333	4.89782
	C-HA 2-2			50	1.0007	48.07	49.1162	24.5409	26.0797	2.17611								B-2	1.0431	3.69	5.30437
	CK 3-1			50	1.0013	124.63	124.581	62.2098
	CK 3-2			50	1.0004	114.34	114.439	57.1964	59.7031	3.54503
	L-HA 3-1			50	1.0029	113.48	113.591	56.6312
	L-HA 3-2			50	1.0027	100.38	100.678	50.2035	53.4174	4.54504
	L-HA 3-1			50	1.0075	81.074	81.6482	40.5202
	L-HA 3-2			50	1.008	80.233	80.8193	40.0889	40.3046	0.304973			First	13.124	10
	C-HA 3-1			50	1.0042	101.79	102.068	50.8206						26.614	25
	C-HA 3-2			50	1.0047	91.624	92.0474	45.8084	48.3145	3.54414				42.211	50
	C-HA 3-1			50	0.9943	113.95	114.054	57.354						61.556	75
	C-HA 3-2			50	0.9902	139.98	139.712	70.5473	63.9506	9.32909
3	CK 1-1			1	0.9937	186.22	245.789	2.47347
	CK 1-2			1	1.003	198.68	262.844	2.62058	2.54703	0.104021
	L-HA 1-1			1	0.9952	178.05	234.606	2.35738
	L-HA 1-2			1	0.9929	198.8	263.009	2.64889	2.50313	0.206134
	L-HA 1-1			1	1.014	163.3	214.416	2.11456
	L-HA 1-2			1	1.0128	179.04	235.961	2.32979	2.22217	0.152192
	C-HA 1-1			1	1.0034	230.95	307.016	3.05975
	C-HA 1-2			1	1.0012	183.41	241.943	2.41653	2.73814	0.454828
	C-HA 1-1			1	1.0004	166.02	218.139	2.18052
	C-HA 1-2			1	1.0036	184.99	244.106	2.4323	2.30641	0.178033
	CK 2-1			50	1.0012	57.256	69.2632	34.5901
	CK 2-2			50	1.0015	71.314	88.5058	44.1866	39.3884	6.78577
	L-HA 2-1			50	0.9952	109.31	140.515	70.5962
	L-HA 2-2			50	0.9924	105.21	134.903	67.9679	69.2821	1.85852
	L-HA 2-1			50	1.0078	115.14	148.495	73.6728
	L-HA 2-2			50	1.0012	129.29	167.863	83.8311	78.7519	7.18301
	C-HA 2-1			50	1.0037	118.45	153.026	76.2307
	C-HA 2-2			50	1.0028	112.584	144.996	72.2957	74.2632	2.78251
	C-HA 2-1			50	1.0035	111.104	142.97	71.2359
	C-HA 2-2			50	1.0055	121.15	156.721	77.932	74.5839	4.73492
	CK 3-1			50	0.9975	126.69	164.304	82.3581
	CK 3-2			50	0.9989	124.54	161.362	80.7696	81.5639	1.12325
	L-HA 3-1			50	0.9952	129.07	167.562	84.1852
	L-HA 3-2			50	1.004	117.59	151.848	75.6217	79.9035	6.0553
	L-HA 3-1			50	1.0093	121.85	157.679	78.1133
	L-HA 3-2			50	1.0109	120.94	156.434	77.3736	77.7434	0.523063
	C-HA 3-1			50	0.999	114.63	147.797	73.9723
	C-HA 3-2			50	0.9993	127.69	165.673	82.8947	78.4335	6.30903
	C-HA 3-1			50	0.998	110.38	141.979	71.1319					4112017
	C-HA 3-2			50	0.9928	120.25	155.489	78.3085	74.7202	5.07461		Second	18.905	5
7	CK 1-1			1	0.9988	198.48	221.383	2.21649					13.245	10
	CK 1-2			1	0.9977	207.54	231.83	2.32365	2.27007	0.0757704			31.212	25
	L-HA 1-1			1	1.0037	190.65	212.354	2.11572					60.327	50
	L-HA 1-2			1	1.005	205.03	228.936	2.27797	2.19684	0.114731			85.712	75
	L-HA 1-1			1	0.992	161.52	178.765	1.80206					123.11	100
	L-HA 1-2			1	0.9929	181.71	202.046	2.0349	1.91848	0.164644
	C-HA 1-1			1	0.9968	206.96	231.161	2.31904
	C-HA 1-2			1	0.9935	231.13	259.032	2.60727	2.46315	0.20381					27.242	25
	C-HA 1-1			1	0.9943	211.75	236.685	2.38042							50.482	50
	C-HA 1-2			1	0.9941	177.03	196.649	1.97816	2.17929	0.284436					73.402	75
	CK 2-1			50	0.9967	134.89	112.234	56.3026							91.653	100
	CK 2-2			50	0.9994	114.51	95.2245	47.6409	51.9718	6.12481
	L-HA 2-1			50	1.0038	106.94	88.9066	44.285
	L-HA 2-2			50	1.0034	104.383	86.7726	43.2393	43.7621	0.739469
	L-HA 2-1			50	0.9984	127.23	105.841	53.0051
	L-HA 2-2			50	0.9958	111.21	92.4704	46.4302	49.7177	4.64919
	C-HA 2-1			50	0.9946	136.85	113.87	57.2439
	C-HA 2-2			50	0.9984	122.39	101.801	50.9822	54.113	4.42769
	C-HA 2-1			50	1	108.61	90.3004	45.1502
	C-HA 2-2			50	1.0002	95.353	79.2361	39.6101	42.3802	3.91742
	CK 3-1			50	0.9987	137.65	114.537	57.3431
	CK 3-2			50	0.9991	132.06	109.872	54.9854	56.1643	1.66719
	L-HA 3-1			50	0.9921	117.78	97.9537	49.3668
	L-HA 3-2			50	0.9914	137.9	114.746	57.8706	53.6187	6.01307
	L-HA 3-1			50	1.0012	112.22	93.3133	46.6007
	L-HA 3-2			50	1.0007	115.13	95.742	47.8375	47.2191	0.874534
	C-HA 3-1			50	0.998	141.7	117.917	59.0768
	C-HA 3-2			50	0.9993	125.44	104.347	52.2099	55.6434	4.85563
	C-HA 3-1			50	1.0004	130.57	108.628	54.2924
	C-HA 3-2			50	1.0005	152.58	126.998	63.4672	58.8798	6.48753
12	CK 1-1			1	0.9988	246.24	205.166	2.05413
	CK 1-2			1	0.9985	274.1	228.418	2.28762	2.17087	0.1651			36.772
	L-HA 1-1			1	1.0014	228.45	190.319	1.90053					32.879	25
	L-HA 1-2			1	1.0025	225.54	187.89	1.87422	1.88737	0.0186052			58.066	50
	L-HA 1-1			1	0.9977	243.73	203.072	2.0354					91.846	75
	L-HA 1-2			1	0.9996	271.75	226.457	2.26548	2.15044	0.162691			119.86	100
	C-HA 1-1			1	0.9966	241.71	201.386	2.02073
	C-HA 1-2			1	0.9958	227.24	189.309	1.90107	1.9609	0.0846072
	C-HA 1-1			1	1.0026	265.1	220.907	2.20334
	C-HA 1-2			1	1.0028	216.2	180.095	1.79592	1.99963	0.288089
	CK 2-1			50	0.9985	165.18	137.514	68.8602
	CK 2-2			50	0.9958	145.81	121.348	60.9297	64.8949	5.6077
	L-HA 2-1			50	1.0039	137.04	114.028	56.7926
	L-HA 2-2			50	1.056	113.39	94.2898	44.6448	50.7187	8.58977
	L-HA 2-1			50	0.9964	139.41	116.006	58.2126
	L-HA 2-2			50	0.9948	134.43	111.85	56.2172	57.2149	1.41095
	C-HA 2-1			50	1.0056	122.6	101.976	50.7043
	C-HA 2-2			50	1.0052	127.98	106.467	52.9579	51.8311	1.59356
	C-HA 2-1			50	0.9995	103.286	85.857	42.95
	C-HA 2-2			50	1.0006	124.6	103.646	51.7918	47.3709	6.25208
	CK 3-1			50	0.9926	128.27	106.709	53.7521
	CK 3-2			50	0.9957	122.68	102.043	51.242	52.497	1.77493
	L-HA 3-1			50	1.0021	121.02	100.658	50.2234
	L-HA 3-2			50	1.0023	130.38	108.47	54.1104	52.1669	2.74848
	L-HA 3-1			50	1.004	130.77	108.795	54.1808
	L-HA 3-2			50	1.0074	122.56	101.943	50.5971	52.389	2.53408
	C-HA 3-1			50	1.0008	131.3	109.237	54.5751
	C-HA 3-2			50	1.0019	137.2	114.162	56.9726	55.7738	1.69528
	C-HA 3-1			50	0.9928	151.24	125.879	63.3962
	C-HA 3-2			50	0.9939	127.52	106.083	53.3669	58.3815	7.09177
18	CK 1-1			1	1.0009	253.74	214.578	2.14385
	CK 1-2			1	1.0026	192.63	164.315	1.63889	1.89137	0.357062		9.584	10
	L-HA 1-1			1	0.9949	189.4	161.658	1.62487				21.725	25
	L-HA 1-2			1	0.9946	190.07	162.209	1.6309	1.62789	0.0042644		54.101	50
	L-HA 1-1			1	1.0001	237.66	201.352	2.01332				80.079	75
	L-HA 1-2			1	1.0008	201.04	171.232	1.71095	1.86214	0.213806		111.47	100
	C-HA 1-1			1	0.996	224.85	190.816	1.91582				178.66	150
	C-HA 1-2			1	0.9979	219.25	186.21	1.86602	1.89092	0.0352172
	C-HA 1-1			1	1.0012	227.91	193.333	1.93101
	C-HA 1-2			1	0.9967	221.49	188.052	1.88675	1.90888	0.0312973
	CK 2-1			50	0.9985	126.28	109.742	54.9535
	CK 2-2			50	0.9987	169	144.879	72.534	63.7438	12.4313
	L-HA 2-1			50	1.002	110.82	97.0264	48.4163
	L-HA 2-2			50	1.0021	116.33	101.558	50.6727	49.5445	1.59552
	L-HA 2-1			50	0.997	88.08	78.3227	39.2792
	L-HA 2-2			50	0.9993	98.654	87.0198	43.5404	41.4098	3.01312
	C-HA 2-1			25	1.0031	186.98	159.668	39.7936
	C-HA 2-2			25	1.0036	221.08	187.715	46.7605	43.277	4.9263
	C-HA 2-1			50	0.9935	130.45	113.172	56.9562
	C-HA 2-2			50	0.9938	109.76	96.1545	48.3772	52.6667	6.0663
	CK 3-1			50	0.9934	109.53	95.9653	48.3015
	CK 3-2			50	0.9938	110.41	96.6891	48.6462	48.4738	0.243751
	L-HA 3-1			50	1.003	146.42	126.307	62.9648
	L-HA 3-2			50	1.0041	124.47	108.253	53.9057	58.4353	6.40572
	L-HA 3-1			50	0.9979	104.74	92.0256	46.1096
	L-HA 3-2			50	0.9975	127.31	110.589	55.4333	50.7714	6.59283
	C-HA 3-1			50	0.9988	155.36	133.661	66.9105
	C-HA 3-2			50	0.9987	185.47	158.426	79.3161	73.1133	8.77205
	C-HA 3-1			50	0.9982	165.97	142.387	71.322
	C-HA 3-2			50	0.9979	158	135.832	68.0589	69.6904	2.30737
24	CK 1-1			1	1.0051	227.82	186.17	1.85226				29.654	25
	CK 1-2			1	1.0032	185.65	153.202	1.52713	1.68969	0.229898		50.424	50
	L-HA 1-1			1	1.0001	243.24	198.226	1.98206				82.833	75
	L-HA 1-2			1	1.0013	200.28	164.639	1.64426	1.81316	0.238861		110.69	100
	L-HA 1-1			1	0.9956	193.53	159.362	1.60067				186.51	150
	L-HA 1-2			1	0.997	213.51	174.983	1.75509	1.67788	0.109196
	C-HA 1-1			1	1.0017	222.59	182.081	1.81772
	C-HA 1-2			1	1.0013	205.46	168.689	1.6847	1.75121	0.094061
	C-HA 1-1			1	1.0019	236.35	192.839	1.92473
	C-HA 1-2			1	1.0002	192.42	158.494	1.58463	1.75468	0.24049
	CK 2-1			50	0.9981	84.285	73.9545	37.0476
	CK 2-2			50	0.9985	106.55	91.3613	45.7493	41.3985	6.15298
	L-HA 2-1			50	1.0044	116.53	99.1637	49.3646
	L-HA 2-2			50	1.007	123.49	104.605	51.9389	50.6518	1.8203
	L-HA 2-1			50	0.9972	125.82	106.427	53.3627
	L-HA 2-2			50	0.9999	145.18	121.562	60.7872	57.0749	5.24991
	C-HA 2-1			50	1.0016	120.04	101.908	50.8725
	C-HA 2-2			50	1.0015	125.78	106.395	53.118	51.9952	1.5878
	C-HA 2-1			50	0.9964	110.17	94.1914	47.2659
	C-HA 2-2			50	0.9976	107.54	92.1353	46.1785	46.7222	0.768905
	CK 3-1			50	1.003	101.43	87.3585	43.5486
	CK 3-2			50	1.0037	95.481	82.7075	41.2013	42.375	1.65977
	L-HA 3-1			50	1.0002	91.726	79.7719	39.878
	L-HA 3-2			50	0.9996	94.135	81.6552	40.844	40.361	0.683059
	L-HA 3-1			50	0.9965	108.63	92.9874	46.657
	L-HA 3-2			50	0.9973	107.43	92.0493	46.1492	46.4031	0.359052
	C-HA 3-1			50	1.0033	130.98	110.461	55.0487
	C-HA 3-2			50	1.0029	125.01	105.793	52.7437	53.8962	1.62986
	C-HA 3-1			50	0.9974	137.11	115.253	57.7768
	C-HA 3-2			50	0.9969	118.02	100.329	50.3203	54.0485	5.27255
30
	CK 1-1			1	0.9946	187.65	139.227	1.39983
	CK 1-2			1	0.993	137.28	102.483	1.03205	1.21594	0.260062
	L-HA 1-1			1	0.9935	158.53	117.984	1.18756
	L-HA 1-2			1	0.9942	172.94	128.497	1.29246	1.24001	0.0741741		12.499	10
	L-HA 1-1			1	0.997	325.99	240.147	2.40869				31.07	25
	L-HA 1-2			1	0.9977	184.33	136.806	1.37121	1.88995	0.733611		61.693	50
	C-HA 1-1			1	0.9926	181.04	134.405	1.35407				100.91	75
	C-HA 1-2			1	0.9936	173.01	128.548	1.29376	1.32392	0.042652		202.74	150
	C-HA 1-1			1	0.996	151.33	112.732	1.13185
	C-HA 1-2			1	0.9941	177.92	132.129	1.32914	1.23049	0.139504
	CK 2-1			50	0.9974	88.263	66.7247	33.4493
	CK 2-2			50	0.9977	84.017	63.6272	31.8869	32.6681	1.10475
	L-HA 2-1			50	0.9948	47.271	36.821	18.5067
	L-HA 2-2			50	0.9955	38.423	30.3664	15.2518	16.8793	2.30157
	L-HA 2-1			50	0.996	82.163	62.2747	31.2624
	L-HA 2-2			50	0.9948	83.814	63.4791	31.9055	31.5839	0.454713
	C-HA 2-1			50	0.9963	99.489	74.914	37.5961
	C-HA 2-2			50	0.9964	109.9	82.5089	41.4035	39.4998	2.69221
	C-HA 2-1			50	0.9988	106.24	79.8389	39.9674
	C-HA 2-2			50	0.995	114.42	85.8062	43.1187	41.543	2.2283
	CK 3-1			50	0.9963	58.842	45.262	22.7151
	CK 3-2			50	0.9982	68.384	52.2229	26.1585	24.4368	2.43491
	L-HA 3-1			50	0.9997	66.898	51.1389	25.5771
	L-HA 3-2			50	0.9994	59.65	45.8515	22.9395	24.2583	1.86508
	L-HA 3-1			50	0.9958	97.003	73.1005	36.7044
	L-HA 3-2			50	0.9934	84.145	63.7206	32.072	34.3882	3.27563
	C-HA 3-1			50	0.9931	110.59	83.0122	41.7945
	C-HA 3-2			50	0.9968	96.777	72.9356	36.5849	39.1897	3.68374
	C-HA 3-1			50	0.9988	97.295	73.3135	36.7008
	C-HA 3-2			50	0.9964	69.05	52.7088	26.4496	31.5752	7.24868

## Sheet: U-bearing
	incubation days
U-Bearing	1	UO2			UO3		UO2(NO3)2
		CK	0.535326	CK	0.16109	CK	0.591444
		L-HA1000	0.0688848	L-HA1000	0.00160747	L-HA1000	0.111298
		L-HA3000	0.108848	L-HA3000	0.029205	L-HA3000	0.0111066
		C-HA1000	0.00392099	C-HA1000	0.0537601	C-HA1000	0.1108
		C-HA3000	0.00716839	C-HA3000	0.0314377	C-HA3000	0.277005
	3	UO2			UO3		UO2(NO3)2				UO3						UO2(NO3)2
		CK	0.00397311	CK	0.0156511	CK	0.000830692				0.16109	0.00160747	0.029205	0.0537601	0.0314377		0.591444	0.111298	0.0111066	0.1108	0.277005
		L-HA1000	0.0158208	L-HA1000	0.00400838	L-HA1000	0.0228798				0.0156511	0.00400838	0.00535071	0.00113449	0.0118575		0.000830692	0.0228798	0.00712123	0.00282772	0.00907232
		L-HA3000	0.0148132	L-HA3000	0.00535071	L-HA3000	0.00712123				0.331997	0.220447	0.0801825	0.567585	0.209349		0.309194	0.0450498	0.0483291	0.394183	0.097916
		C-HA1000	0.0245648	C-HA1000	0.00113449	C-HA1000	0.00282772				0.865276	0.0213023	0.046516	0.686627	0.851626		0.562062	0.193167	0.113332	0.421953	0.720325
		C-HA3000	0.0198877	C-HA3000	0.0118575	C-HA3000	0.00907232				0.752583	0.0844859	0.0878415	0.0916534	1.44888		0.0485582	0.519885	0.330084	0.855407	0.556765
											0.797451	0.54185	0.193402	0.30398	0.161722		0.100135	0.404721	0.0434421	0.659642	0.489322
	7	UO2			UO3		UO2(NO3)2				0.228661	0.20522	0.3103	0.21928	0.134538		0.0191035	0.123343	0.0846543	0.028353	0.306983
		CK	0.616432	CK	0.331997	CK	0.309194
		L-HA1000	0.15909	L-HA1000	0.220447	L-HA1000	0.0450498
		L-HA3000	0.0396931	L-HA3000	0.0801825	L-HA3000	0.0483291				UO2(NO3)2
		C-HA1000	0.0373456	C-HA1000	0.567585	C-HA1000	0.394183
		C-HA3000	0.00890679	C-HA3000	0.209349	C-HA3000	0.097916
	12	UO2			UO3		UO2(NO3)2
		CK	0.834482	CK	0.865276	CK	0.562062
		L-HA1000	0.0845024	L-HA1000	0.0213023	L-HA1000	0.193167
		L-HA3000	0.0173546	L-HA3000	0.046516	L-HA3000	0.113332
		C-HA1000	0.00528593	C-HA1000	0.686627	C-HA1000	0.421953
		C-HA3000	0.126763	C-HA3000	0.851626	C-HA3000	0.720325
	18	UO2			UO3		UO2(NO3)2
		CK	0.838015	CK	0.752583	CK	0.0485582
		L-HA1000	0.0750639	L-HA1000	0.0844859	L-HA1000	0.519885
		L-HA3000	0.0246017	L-HA3000	0.0878415	L-HA3000	0.330084
		C-HA1000	0.00691693	C-HA1000	0.0916534	C-HA1000	2.08554
		C-HA3000	0.00673897	C-HA3000	1.44888	C-HA3000	0.556765
	24	UO2			UO3		UO2(NO3)2
		CK	0.58088	CK	0.797451	CK	0.100135
		L-HA1000	0.186863	L-HA1000	0.54185	L-HA1000	0.404721
		L-HA3000	0.00933297	L-HA3000	0.193402	L-HA3000	0.0434421				0.535326	0.0688848	0.108848	0.00392099	0.00716839
		C-HA1000	0.0484148	C-HA1000	0.30398	C-HA1000	2.06596				0.00397311	0.0158208	0.0148132	0.0245648	0.0198877
		C-HA3000	0.0136954	C-HA3000	0.161722	C-HA3000	2.01489				0.616432	0.15909	0.0396931	0.0373456	0.00890679
											0.834482	0.0845024	0.0173546	0.00528593	0.126763
	30	UO2			UO3		UO2(NO3)2				0.838015	0.0750639	0.0246017	0.00691693	0.00673897
		CK	0.429271	CK	0.228661	CK	0.0191035				0.58088	0.186863	0.00933297	0.0484148	0.0136954
		L-HA1000	0.0261735	L-HA1000	0.20522	L-HA1000	0.123343				0.429271	0.0261735	0.00060892	0.00739598	0.0030458
		L-HA3000	0.00060892	L-HA3000	0.3103	L-HA3000	0.0846543
		C-HA1000	0.00739598	C-HA1000	0.21928	C-HA1000	0.028353
		C-HA3000	0.0030458	C-HA3000	0.134538	C-HA3000	0.306983

## Sheet: weak-acid
	Incubation days
weak-acid	1	UO2			UO3		UO2(NO3)2
		CK	0.0489794	CK	2.6823	CK	0.349343
		L-HA1000	0.481507	L-HA1000	0.809992	L-HA1000	4.42716
		L-HA3000	0.340219	L-HA3000	2.77274	L-HA3000	1.3109
		C-HA1000	0.19384	C-HA1000	5.96947	C-HA1000	2.90201
		C-HA3000	0.325609	C-HA3000	3.34969	C-HA3000	1.61595
	3	UO2			UO3		UO2(NO3)2
		CK	1.54538	CK	1.58094	CK	0.326739
		L-HA1000	0.184191	L-HA1000	8.3354	L-HA1000	0.707334
		L-HA3000	0.74836	L-HA3000	12.1587	L-HA3000	2.0054
		C-HA1000	0.154736	C-HA1000	6.19405	C-HA1000	0.783274
		C-HA3000	0.311729	C-HA3000	10.9699	C-HA3000	1.24652
	7	UO2			UO3		UO2(NO3)2
		CK	1.40073	CK	13.6614	CK	1.82225
		L-HA1000	0.170409	L-HA1000	52.5434	L-HA1000	0.589468
		L-HA3000	0.0945288	L-HA3000	9.48856	L-HA3000	0.320072
		C-HA1000	0.317115	C-HA1000	1.50144	C-HA1000	0.270828
		C-HA3000	0.177817	C-HA3000	0.22787	C-HA3000	1.08534
	12	UO2			UO3		UO2(NO3)2
		CK	1.92284	CK	0.784116	CK	7.08073
		L-HA1000	0.177318	L-HA1000	4.33826	L-HA1000	4.40881
		L-HA3000	0.246546	L-HA3000	14.1316	L-HA3000	1.96474
		C-HA1000	0.287082	C-HA1000	10.7685	C-HA1000	6.86272
		C-HA3000	0.133748	C-HA3000	17.7913	C-HA3000	3.64646
	18	UO2			UO3		UO2(NO3)2
		CK	1.57079	CK	23.1924	CK	3.52652
		L-HA1000	0.259808	L-HA1000	14.7803	L-HA1000	3.24806
		L-HA3000	0.758761	L-HA3000	9.97939	L-HA3000	2.84396
		C-HA1000	0.266346	C-HA1000	2.53156	C-HA1000	2.45206
		C-HA3000	0.0613002	C-HA3000	4.44139	C-HA3000	1.202
	24	UO2			UO3		UO2(NO3)2
		CK	16.9252	CK	10.7795	CK	4.89129
		L-HA1000	2.2457	L-HA1000	1.05263	L-HA1000	5.01124
		L-HA3000	0.764899	L-HA3000	9.07338	L-HA3000	1.26671
		C-HA1000	0.751355	C-HA1000	3.68713	C-HA1000	2.90012
		C-HA3000	0.456409	C-HA3000	1.60593	C-HA3000	0.757864
	30	UO2			UO3		UO2(NO3)2
		CK	0.604237	CK	0.430589	CK	0.608545
		L-HA1000	0.10528	L-HA1000	0.786609	L-HA1000	0.828965
		L-HA3000	0.18847	L-HA3000	0.496807	L-HA3000	0.157389
		C-HA1000	0.153322	C-HA1000	1.08545	C-HA1000	1.94062
		C-HA3000	0.0373486	C-HA3000	1.78997	C-HA3000	0.344971

## Sheet: bioavailability
UO2	CK			L-HA1000			L-HA3000			C-HA1000			C-HA3000
1	2.34716		1	1.98675		1	2.02015		1	2.23609		1	1.52001
3	2.54703		3	2.50313		3	2.22217		3	2.73814		3	2.30641
7	2.27007		7	2.19684		7	1.91848		7	2.46315		7	2.17929
12	2.17087		12	1.88737		12	2.15044		12	1.9609		12	1.99963
18	1.89137		18	1.62789		18	1.86214		18	1.89092		18	1.90888
24	1.68969		24	1.81316		24	1.67788		24	1.75121		24	1.75468
30	1.21594		30	1.24001		30	1.88995		30	1.32392		30	1.23049
UO3	CK			L-HA1000			L-HA3000			C-HA1000			C-HA3000
1	27.6407		1	37.0537		1	33.8491		1	24.3716		1	24.3716
3	39.3884		3	72.7206		3	89.0056		3	81.0758		3	81.0758
7	51.9718		7	41.6827		7	49.7177		7	54.121		7	54.121
12	64.8949		12	50.7187		12	57.2216		12	51.8311		12	51.8311
18	63.7438		18	36.4146		18	41.4098		18	63.1739		18	63.1739
24	41.3985		24	38.3106		24	57.0749		24	51.9952		24	51.9952
30	32.6681		30	16.8819		30	31.5839		30	39.4994		30	39.4994
UO2(NO3)2	CK			L-HA1000			L-HA3000			C-HA1000			C-HA3000
1	10.5091		1	4.54504		1	0.304973		1	3.54414		1	9.32909
3	1.12325		3	10.8968		3	0.523063		3	6.30903		3	5.07461
7	1.66719		7	6.01307		7	0.874534		7	4.85563		7	6.48753
12	1.77493		12	2.74848		12	2.53408		12	1.69528		12	7.09177
18	0.243751		18	12.2011		18	6.59283		18	32.065		18	19.7893
24	1.65977		24	0.683059		24	0.359052		24	1.62986		24	5.27255
30	2.43491		30	1.86508		30	3.27563		30	3.68374		30	7.24868
