# Supplementary material for: Effect of humic acid derived from leonardite on the redistribution of uranium fractions in soil
Source: PeerJ. 2022 Oct 7;10:e14162. doi: 10.7717/peerj.14162 (PMC9549884; doi:10.7717/peerj.14162)
Supplement: Supplemental Information 3 [file peerj-10-14162-s003.xlsx]

## Sheet: HA on soil pH
Soil number	pH	Average
UO2
C1-1	7.42
C1-2	7.44	7.43
L-HA1000 1-1	7.38
L-HA1000 1-2	7.4	7.39
L-HA3000 1-1	7.3
L-HA3000 1-2	7.28	7.29
C-HA1000 1-1	7.48
C-HA1000 1-2	7.46	7.47
C-HA3000 1-1	7.56
C-HA3000 1-2	7.5	7.53
UO3
C2-1	7.48
C2-2	7.48	7.48
Leo1000 2-1	7.43
Leo1000 2-2	7.41	7.42
Leo3000 2-1	7.35
Leo3000 2-2	7.31	7.33
HA1000 2-1	7.55
HA1000 2-2	7.55	7.55
HA3000 2-1	7.57
HA3000 2-2	7.58	7.575
UO2(NO3)2
C3-1	7.55
C3-2	7.55	7.55
Leo1000 3-1	7.45
Leo1000 3-2	7.42	7.435
Leo3000 3-1	7.35
Leo3000 3-2	7.36	7.355
HA1000 3-1	7.68
HA1000 3-2	7.7	7.69
HA3000 3-1	7.72
HA3000 3-2	7.65	7.685
pH of C-HA	10.2
pH of L-HA	4.2
